1 **TITLE PAGE**

2 Version: April 11, 2017

3

4 **Title:** Polymorphisms in the vitamin D receptor gene are associated with reduced rate of  
5 sputum culture conversion in multidrug-resistant tuberculosis patients in South Africa

6

7 **Authors:** Matthew J Magee (1), Yan V. Sun (2), James CM Brust (3), N. Sarita Shah  
8 (5), Yuming Ning (3), Salim Allana (2), Angela Campbell (2), Qin Hui (2), Koleka  
9 Mlisana (4), Pravi Moodley(4), Neel R Gandhi (2,6,7)

10 **Authors' Affiliations:**

11 1. Division of Epidemiology and Biostatistics, School of Public Health, Georgia  
12 State University, Atlanta, USA

13 2. Department of Epidemiology, Rollins School of Public Health, Emory University,  
14 Atlanta, USA

15 3. Divisions of General Internal Medicine and Infectious Diseases, Albert Einstein  
16 College of Medicine, Bronx, USA

17 4. School of Laboratory Medicine and Medical Sciences, University of KwaZulu-  
18 Natal, Durban, South Africa

19 5. US Centers for Disease Control and Prevention, Atlanta, USA

20 6. Division of Infectious Diseases, Emory School of Medicine, Emory University,  
21 Atlanta, USA

22 7. Department of Global Health, Rollins School of Public Health, Emory University,  
23 Atlanta, USA

24 **Keywords:** vitamin D, vitamin D receptor gene, genetic polymorphisms, South Africa

25 **Short title:** Vitamin D receptor gene polymorphisms and MDR TB

26 **Word count: Abstract:** 298; **Manuscript:** 2664

27

28 **Corresponding Author:**

29 Matthew Magee, PhD, MPH

30 Email: [mjmagee@gsu.edu](mailto:mjmagee@gsu.edu) Tel: +1 404 413 1797

31

32 **Author contributions:** MJM, YVS, JCMB, SS, and NRG conceived and designed the  
33 study and drafted the initial manuscript. MJM, YVS, YN, and QH performed the data  
34 analyses. All authors contributed to interpretation of the data, revised the manuscript,  
35 and approved the final version.

36

37 The findings and conclusions in this article are those of the authors and do not  
38 necessarily represent the views of the Centers for Disease Control and Prevention  
39 (CDC). The use of trade names and commercial sources is for identification only and  
40 does not imply endorsement by the CDC.

## 41 **Abstract**

42 Background: Vitamin D modulates the inflammatory and immune response to  
43 tuberculosis (TB) and also mediates the induction of the antimicrobial peptide  
44 cathelicidin. Deficiency of 25-hydroxyvitamin D and single nucleotide polymorphisms  
45 (SNPs) in the vitamin D receptor (VDR) gene may increase the risk of TB disease and  
46 decrease culture conversion rates in drug susceptible TB. Whether these VDR SNPs  
47 are found in African populations or impact multidrug-resistant (MDR) TB treatment has  
48 not been established. We aimed to determine if SNPs in the VDR gene were associated  
49 with sputum culture conversion among a cohort of MDR TB patients in South Africa.

50 Methods: We conducted a prospective cohort study of adult MDR TB patients receiving  
51 second-line TB treatment in KwaZulu-Natal province. Subjects had monthly sputum  
52 cultures performed. In a subset of participants, whole blood samples were obtained for  
53 genomic analyses. Genomic DNA was extracted and genotyped with Affymetrix Axiom  
54 Pan-African Array. Cox proportional models were used to determine the association  
55 between VDR SNPs and rate of culture conversion.

56 Results: Genomic analyses were performed on 91 MDR TB subjects enrolled in the  
57 sub-study; 60% were female and median age was 35 years (interquartile range [IQR]  
58 29-42). Smoking was reported by 21% of subjects and most subjects had HIV (80%),  
59 were smear negative (57%), and had cavitory disease (55%). Overall, 87 (96%)  
60 subjects initially converted cultures to negative, with median time to culture conversion  
61 of 57 days (IQR 17-114). Of 121 VDR SNPs examined, 10 were significantly associated  
62 ( $p < 0.01$ ) with rate of sputum conversion in multivariable analyses. Each additional risk

63 allele on SNP rs74085240 delayed culture conversion significantly (adjusted hazard  
64 ratio 0.30, 95% confidence interval 0.14-0.67).

65 Conclusions: Polymorphisms in the VDR gene were associated with rate of sputum  
66 culture conversion in MDR TB patients in this high HIV prevalence setting in South  
67 Africa.

68

69

## 70 Introduction

71 In 2015 there were an estimated 480,000 cases of multidrug-resistant (MDR)  
72 tuberculosis (TB) worldwide [1]. MDR TB (resistance to at least isoniazid and rifampin)  
73 treatment is less effective, more toxic and costly compared to drug susceptible TB [2].  
74 Importantly MDR TB is associated with poor TB treatment outcomes and increased risk  
75 of death [3,4], in 2014 there were an estimated 190,000 deaths from MDR TB [5].  
76 Despite global efforts, MDR TB remains difficult to diagnose and treat, and few new  
77 therapeutic options are available [6].

78  
79 Given the paucity of new drugs available for the treatment of MDR TB there has been  
80 substantial clinical interest in adjunctive use of 25-hydroxyvitamin D (vitamin D) to  
81 improve TB—including MDR TB—treatment outcomes [7]. Vitamin D has anti-  
82 inflammatory and anti-bacterial properties that could theoretically improve clinical TB  
83 outcomes. The active metabolite of vitamin D, calcitriol, mediates innate immune  
84 responses via the induction of the antimicrobial peptide cathelicidin and reactive oxygen  
85 intermediates. Vitamin D also promotes macrophage-mediated killing of *Mycobacterium*  
86 *tuberculosis* and modulates both anti-inflammatory and pro-inflammatory T-helper  
87 responses to TB [8,9]. Low exposure to solar ultraviolet light, inadequate intake of  
88 vitamin D and its precursors, or particular genotypes of the vitamin D receptor (VDR)  
89 may lead to vitamin D deficiency which, in turn, could inhibit reduction of bacillary  
90 burden, inhibit culture conversion, and impair the effectiveness of TB treatment. Despite  
91 the hypothesized plausibility that vitamin D supplementation may improve TB treatment  
92 outcomes and the pervasiveness of vitamin D deficiency, clinical trials to date among

93 patients with drug susceptible TB have not demonstrated efficacy in improving rate of  
94 sputum culture conversion [10-12]. However, evidence suggests that the effects of  
95 vitamin D may vary based on vitamin D receptor (VDR) genotypes, implying that  
96 supplementation may only be of clinical benefit in subpopulations with a particular VDR  
97 genotype [13].

98

99 In certain ethnic populations, single nucleotide polymorphisms (SNPs) in the vitamin D  
100 receptor (VDR) gene may increase the risk of TB disease [14]. Three previous studies  
101 have reported an association between VDR gene polymorphisms and smear or culture  
102 conversion time in patients with pulmonary TB [15-17]. However, the extent to which  
103 VDR SNPs are found in African populations or impact MDR TB treatment is limited.  
104 South Africa has a high burden of drug-resistant TB, with an estimated 13,000 MDR TB  
105 cases in 2014 and 2% MDR TB prevalence rate among all new TB cases [5]. In this  
106 context, we aimed to determine if SNPs in the VDR gene were associated with time to  
107 sputum culture conversion among a cohort of MDR TB patients in South Africa.

108

## 109 **Methods**

### 110 **Parent Study**

111 The SHOUT study was a prospective observational cohort study among patients  
112 receiving second-line TB treatment for MDR TB from three sites in KwaZulu-Natal  
113 province, South Africa between 2011 and 2015. KwaZulu-Natal is the South African  
114 province that has been most severely affected by TB (incidence: 1076 cases per  
115 100,000 population) and HIV (prevalence: 17%) [18,19]. Patients 18 years or older were

116 eligible to participate if they had a sputum culture positive for *M. tuberculosis* with  
117 phenotypic resistance to both isoniazid and rifampin. Patients with unknown HIV status  
118 at the time of enrollment were offered an HIV test. Patients were excluded if they had  
119 previous MDR TB treatment, resistance to either fluoroquinolones or injectable TB  
120 medications, renal or hepatic dysfunction, or were pregnant. Subjects were treated with  
121 the standardized South African MDR TB regimen of kanamycin, moxifloxacin,  
122 ethionamide, terizidone, ethambutol, and pyrazinamide. Kanamycin was typically given  
123 for a minimum of 6 months, or 4 months after culture-conversion, and oral medications  
124 were continued without kanamycin for an additional 12-18 months after culture-  
125 conversion. All HIV co-infected participants were initiated on ART within 2 months of  
126 MDR TB treatment initiation, regardless of CD4 count, if they were not already receiving  
127 ART. Standard ART regimens consisted of efavirenz, and stavudine and lamivudine  
128 prior to 2013, or tenofovir and emtricitabine afterwards. Study participants were seen  
129 monthly for follow-up for the duration of MDR TB treatment, which is typically 21-24  
130 months.

131

## 132 **Study population, Measures and Definitions**

133 The current study was conducted among a subset of patients from the parent SHOUT  
134 MDR TB study who consented to have whole blood samples collected for genomic  
135 analyses. Sub-study patients had the same inclusion/exclusion criteria as the parent  
136 study and were enrolled beginning in April 2013 until the target (n=100) was reached.

137

## 138 **Measures and Definitions**

139

140 The primary outcome of interest for the study was time to initial sputum culture  
141 conversion. Sputum cultures were performed monthly during MDR TB treatment.  
142 Mycobacterial cultures and drug-susceptibility testing (DST) were performed as  
143 previously described [4]. Time to sputum culture conversion was defined by the number  
144 of days between MDR TB treatment initiation and the first of two negative sputum  
145 cultures [20]. Patients who converted sputum cultures to negative before the start of  
146 MDR TB treatment were defined as having a 1 day conversion time. A secondary  
147 outcome of interest was poor tuberculosis treatment outcome and was defined as a  
148 patient who died, interrupted treatment, or had treatment failure.

149

150 The primary exposures of interest were VDR gene polymorphisms. Participant samples  
151 were genotyped using the Affymetrix® Axiom Pan-African Array according to the  
152 manufacturer's instructions [21]. Quality checks were performed to ensure the overall  
153 SNP call rate was  $\geq 95\%$  and that there was no sex mismatch between genotypic and  
154 phenotypic measurement. SNPs were excluded if they had an unknown chromosomal  
155 location, a call rate less than 95%, a Hardy-Weinberg Equilibrium (HWE)  $p$ -value less  
156 than 0.0001 or a minor allele frequency (MAF) less than 0.05. After quality control filters,  
157 1,494,763 SNPs were available for genetic analysis. South African samples were  
158 pooled with HapMap EUR, YRI and ASW populations to identify population structure  
159 relative to European and West African ancestry [22]. Top principal components (PCs)  
160 were calculated using independent SNPs after pruning by pair-wise linkage  
161 disequilibrium  $R^2$  larger than 0.1 within windows of 50 SNPs. Using base pair location of

162 human genome build 37, there were 121 SNPs annotated to the VDR gene and passed  
163 quality control filters.

164

165 Smoking status and alcohol use were self-reported by study patients. Both smoking  
166 status and alcohol use were categorized dichotomously as current use (yes/no).

167

## 168 **Statistical Analyses**

169 We examined 121 VDR SNPs to assess their association with rate of sputum culture  
170 conversion among patients with MDR TB. Each SNP was coded using the additive  
171 genetic effect. Cox proportional models were used to determine the association  
172 between VDR SNPs (additive effect) and the hazard rate of initial sputum culture  
173 conversion. Patients who had a positive culture at time of MDR TB diagnosis but  
174 converted sputum cultures to negative before the start of MDR TB treatment were  
175 censored at day 1. Patients who died or failed treatment before an initial sputum culture  
176 conversion were censored. All models were adjusted for age, sex, smoking status,  
177 alcohol, AFB smear status, HIV status, and cavitary disease. For the secondary  
178 outcome of TB treatment result, we used logistic regression to estimate the odds of poor  
179 TB treatment outcome among a subset of SNPs associated with reduced rate of culture  
180 conversion. Patients who withdrew from the study before treatment completion were  
181 excluded from the secondary outcome analysis.

182

## 183 **Ethics**



184 The study protocol was approved by the institutional review boards at the University of  
185 KwaZulu-Natal, Albert Einstein College of Medicine, and Emory University, and by the  
186 KwaZulu-Natal Department of Health and CDC's National Center for HIV, Hepatitis,  
187 STDs and Tuberculosis. All participants signed written informed consent.

188

## 189 **Results**

190 From 2011-2013, the parent cohort study screened 365 patients and enrolled 206.

191 Among patients enrolled in the parent study, 103 provided samples for the present sub-  
192 study, 7 were not processed due to DNA extraction errors, and 5 patients were late  
193 excluded from the parent study due to second line drug resistance. The 91 remaining  
194 participants were included in the current sub-study for genomic analyses and of these,  
195 55 (60%) were female and the median age was 35 years (interquartile range [IQR] 29-  
196 42) (Table 1). Most patients were HIV co-infected (n=73, 80%), had undetectable viral  
197 load (n=23/42, 55%) and the median baseline CD4 count of 199 cells/mm<sup>3</sup> (IQR 143-  
198 289). Thirty-nine (43%) patients were AFB smear positive, 50 (55%) had cavitary  
199 disease, and 74 (81%) had previously been treated for TB. Smoking was reported by  
200 21% of patients.

201

202 All samples passed standard genome-wide association study (GWAS) quality control  
203 filters with the lowest individual level SNP call rate of 98.2%. Using top two PCs from  
204 GWAS data (Figure 1), we observed the separation of South Africans from populations  
205 with known African ancestry (YRI and ASW), and European ancestry (EUR). PC1  
206 clustered European versus African ancestry, while PC2 further distinguished West

207 Africans and South Africans. Within South African samples in this study, no outlier  
208 (3SD) was observed using top 10 PCs, indicating a genetically homogeneous  
209 population.

210

211 Overall, 87 (96%) subjects converted sputum cultures to negative. Of the 87 who  
212 converted sputum cultures to negative, 24% (21/87) were positive at the time of MDR  
213 TB diagnosis but converted to negative before the time of MDR TB treatment start. The  
214 median time to culture conversion was 57 days (IQR 17-114); among patients who were  
215 not culture negative at time of treatment initiation the median time to conversion was 82  
216 days (IQR 53-143). Among patients who converted, 50 (55.0%) were culture negative  
217 by two months of second-line treatment (Table 1). Compared to females, males were  
218 significantly more likely to be sputum culture positive at two months (36.4% [20/55] vs.  
219 58.3% [21/36],  $p=0.04$ ).

220

221 Of 121 VDR SNPs examined, 10 were significantly associated ( $p<0.05$ ) with hazard rate  
222 of sputum culture conversion in multivariable analyses (Table 2). The estimated slower  
223 conversion rate (adjusted hazard ratio of sputum culture conversion  $<1.0$ ) ranged from  
224 0.30 (95% CI 0.14-0.67) for rs74085240 to 0.64 (95%CI 0.42-0.98) for rs11168287. For  
225 example, each additional risk allele on SNP rs74085240 delayed the rate of culture  
226 conversion by 70% (aHR 0.55, 95% CI 0.36-0.85). Two VDR SNPs (rs11168327 and  
227 rs11574143) were associated with significantly improved rate (adjusted hazard ratio  
228  $>1.0$ ) of culture conversion (Table 2).

229

230 Overall, 19% (17/88) of patients had a poor TB treatment outcome and 3 additional  
231 patients withdrew treatment. We did not detect any genotypes associated with a  
232 significant increased odds of poor TB treatment outcome (Table 3).

233

## 234 **Discussion**

235 We examined 121 SNPs in the VDR gene region and found a subset to be associated  
236 with rate of sputum culture conversion among patients with MDR TB in South Africa.  
237 Specifically, we identified 9 VDR SNPs that were associated with an estimated 50% to  
238 25% reduced (delayed conversion) rate of sputum culture conversion among patients  
239 receiving second-line TB therapy. Our findings provide new data about the relationship  
240 between VDR polymorphisms and sputum culture conversion among patients with MDR  
241 TB in South Africa.

242

243 Our findings in patients with MDR TB are consistent with three previous studies that  
244 reported significantly lower rates of sputum culture conversion among patients with drug  
245 susceptible pulmonary TB who had specific VDR polymorphisms [10,15,17]. First, an  
246 observational longitudinal study among 78 Peruvian patients with confirmed pulmonary  
247 TB reported that patients with the *TT TaqI* genotype (previous nomenclature now  
248 typically replaced by endonuclease digestion pattern) had significantly longer time to  
249 sputum culture conversion (median 46 days for *TT* genotype vs. 16 days for *Tt*  
250 genotype) [15]. Second, in 2011 Martineau et al conducted a randomized control trial in  
251 London, testing the efficacy of 2.5mg vitamin D<sub>3</sub> supplementation to reduce culture  
252 conversion time in smear positive TB patients [10]. The trial reported no overall effect of

253 supplementation on culture conversion rates, but the authors did report an interaction  
254 between vitamin D<sub>3</sub> supplementation and culture conversion with *TaqI* genotype.  
255 Specifically, supplementation was beneficial among patients with *tt* genotype (HR 8.09,  
256 95%CI 1.36-48.01). Unlike the studies from Peru and London, we did not observe an  
257 association between rs731236 (*TaqI* genotype defined by endonuclease digestion  
258 pattern) and rate of sputum culture conversion. Third, an observational longitudinal  
259 study of HIV-negative patients with pulmonary TB from the Western Cape of South  
260 Africa reported that a significantly lower proportion of patients with *Apal aa* genotype  
261 had converted cultures by month 2 of TB treatment compared to patients with *Apal Aa*  
262 genotype (26% vs. 51%, p=0.03) [17]. All three studies are consistent with our findings  
263 that VDR polymorphisms are associated with rate of culture conversion. Unlike the  
264 previous studies, our study identified SNPs significantly associated with rate of culture  
265 conversion in patients with MDR TB.

266

267 To our knowledge, only one previous study examined the association between VDR  
268 genotypes and time to culture conversion in patients with MDR TB. In 2012 Rathored et  
269 al. followed 236 HIV-negative patients with MDR TB during DOTS-Plus treatment in  
270 India and reported no significant differences in bivariate analyses between the three  
271 VDR genotypes examined (*BsmI*, *TaqI*, *FokI*) and time to culture conversion [16].  
272 However, in our study we examined 121 specific SNPs on the VDR gene region and  
273 adjusted for important confounding factors (i.e., smoking status); Rathored et al. did not  
274 adjust for confounding which may partially explain why we reported significant  
275 differences in rates of culture conversion and the previous study did not. Similar to the

276 study in India, we did not observe a significant association between *BsmI* (rs1544410)  
277 or *TaqI* (rs731236) genotypes and time to culture conversion.

278

279 Several hypothesized biologic mechanisms may explain why polymorphisms in the VDR  
280 gene are associated with rate of sputum culture conversion in patients with MDR TB.

281 Although vitamin D supplementation has not been demonstrated to be efficacious in  
282 improving culture conversion time in drug-susceptible TB treatment [10-12], vitamin D  
283 likely has a role in TB treatment-induced modulation of circulating immunologic signals.

284 Circulating immune signals are affected by TB treatment alone, for example interleukin  
285 (IL)-10, cathelicidin LL-37, and neutrophil gelatinase-associated lipocalin (NGAL) are  
286 suppressed by medications administered during the intensive phase TB treatment.

287 Moreover, a randomized trial from London demonstrated that vitamin D

288 supplementation enhanced the immune effects of TB treatment. In the trial of 126

289 smear-positive pulmonary TB patients, Coussens et al. reported that patients receiving  
290 vitamin D supplementation during first-line treatment had TB treatment-induced

291 increases in lymphocytes and reduced concentrations of inflammatory markers [23].

292 Therefore, it is plausible that effects of second-line TB treatment on the immune

293 responses may be modified differently by vitamin D compared to first-line TB treatment  
294 immune modulation by vitamin D.

295

296 Our study was subject to limitations. First, we did not measure plasma levels of vitamin

297 D or calcitriol. Therefore, we were unable to verify if vitamin D levels were affected by

298 polymorphisms in the VDR SNPs or if the polymorphisms affected culture conversion

299 directly. Second, we did not measure any immune modulating signals. Vitamin D is  
300 hypothesized to affect sputum culture conversion through immune modulation of  
301 cytokines (interferon-gamma, IL-2, IL-12) chemokines (chemokine ligand (CXCL)-9,  
302 CXCL-10, matrix metalloproteinase-9) and antigen stimulated responses (Th1) [23].  
303 Consequently, we were unable to determine if VDR SNPs influenced the expression of  
304 immune modulating signals that may affect rate of culture conversion. Third, our sample  
305 had relatively low power and we were therefore unable to adjust statistical tests for  
306 multiple comparisons. We did not have power to adjust for covariates in the logistic  
307 regression models that were used to estimate the odds of poor MDR TB treatment  
308 outcome by VDR SNPs. Fourth, we did not examine sputum culture reversions to  
309 positive. The analysis only analyzed the association between VDR SNPs and the  
310 patients' first sputum culture conversion and therefore does not assess the association  
311 with sustained conversion.

312  
313 Despite limitations, our study had several strengths. Foremost, we examined 121  
314 specific SNPs in the VDR gene region among patients with MDR TB from a genetically  
315 distinct population. Previous similar studies have focused on VDR polymorphisms at the  
316 level of *FokI*, *Apal*, and *TaqI* genotypes but did not measure specific SNPs and only one  
317 previous study enrolled patients with TB from South Africa (which included only drug-  
318 susceptible patients). Second, our study only included patients with culture- and DST-  
319 confirmed MDR TB and followed patients monthly to obtain cultures during second-line  
320 TB treatment. Previous studies examining the association between VDR polymorphisms  
321 and response to TB treatment were primarily among drug susceptible patients, included

322 patients without culture confirmed TB, largely examined sputum smear conversion at  
323 one time point, and few adjusted for key confounders [24,25].

324

## 325 **Acknowledgements**

326 We are grateful to the study team at the University of KwaZulu-Natal for their tireless  
327 efforts in data collection, record abstraction, participant recruitment and interviews.

328 Finally, we thank the participants and their families who consented to participate in this  
329 study.

330

331

## References

- 332  
333  
334 1. WHO (2016) Global tuberculosis report 2016.  
335 2. Centers for Disease C, Prevention (2013) Provisional CDC guidelines for the use and  
336 safety monitoring of bedaquiline fumarate (Sirturo) for the treatment of multidrug-  
337 resistant tuberculosis. *MMWR Recomm Rep* 62: 1-12.  
338 3. Gandhi NR, Nunn P, Dheda K, Schaaf HS, Zignol M, et al. (2010) Multidrug-resistant  
339 and extensively drug-resistant tuberculosis: a threat to global control of  
340 tuberculosis. *Lancet* 375: 1830-1843.  
341 4. Gandhi NR, Moll A, Sturm AW, Pawinski R, Govender T, et al. (2006) Extensively  
342 drug-resistant tuberculosis as a cause of death in patients co-infected with  
343 tuberculosis and HIV in a rural area of South Africa. *Lancet* 368: 1575-1580.  
344 5. WHO (2015) Global tuberculosis report 2015. Geneva: World Health Organization.  
345 6. WHO (2016) WHO Treatment guidelines for drug-resistant tuberculosis – 2016  
346 update.  
347 7. Cegielski P, Vernon A (2015) Tuberculosis and vitamin D: what's the rest of the  
348 story? *Lancet Infect Dis* 15: 489-490.  
349 8. Bruns H, Stenger S (2014) New insights into the interaction of Mycobacterium  
350 tuberculosis and human macrophages. *Future Microbiol* 9: 327-341.  
351 9. Coussens AK, Martineau AR, Wilkinson RJ (2014) Anti-Inflammatory and  
352 Antimicrobial Actions of Vitamin D in Combating TB/HIV. *Scientifica (Cairo)* 2014:  
353 903680.  
354 10. Martineau AR, Timms PM, Bothamley GH, Hanifa Y, Islam K, et al. (2011) High-  
355 dose vitamin D(3) during intensive-phase antimicrobial treatment of pulmonary  
356 tuberculosis: a double-blind randomised controlled trial. *Lancet* 377: 242-250.  
357 11. Tukvadze N, Sanikidze E, Kipiani M, Hebbar G, Easley KA, et al. (2015) High-dose  
358 vitamin D3 in adults with pulmonary tuberculosis: a double-blind randomized  
359 controlled trial. *Am J Clin Nutr* 102: 1059-1069.  
360 12. Daley P, Jagannathan V, John KR, Sarojini J, Latha A, et al. (2015) Adjunctive  
361 vitamin D for treatment of active tuberculosis in India: a randomised, double-  
362 blind, placebo-controlled trial. *Lancet Infect Dis* 15: 528-534.  
363 13. Ralph AP, Lucas RM, Norval M (2013) Vitamin D and solar ultraviolet radiation in  
364 the risk and treatment of tuberculosis. *Lancet Infect Dis* 13: 77-88.  
365 14. Gao L, Tao Y, Zhang L, Jin Q (2010) Vitamin D receptor genetic polymorphisms and  
366 tuberculosis: updated systematic review and meta-analysis. *Int J Tuberc Lung*  
367 *Dis* 14: 15-23.  
368 15. Roth DE, Soto G, Arenas F, Bautista CT, Ortiz J, et al. (2004) Association between  
369 vitamin D receptor gene polymorphisms and response to treatment of pulmonary  
370 tuberculosis. *J Infect Dis* 190: 920-927.  
371 16. Rathored J, Sharma SK, Singh B, Banavaliker JN, Sreenivas V, et al. (2012) Risk  
372 and outcome of multidrug-resistant tuberculosis: vitamin D receptor  
373 polymorphisms and serum 25(OH)D. *Int J Tuberc Lung Dis* 16: 1522-1528.  
374 17. Babb C, van der Merwe L, Beyers N, Pheiffer C, Walzl G, et al. (2007) Vitamin D  
375 receptor gene polymorphisms and sputum conversion time in pulmonary  
376 tuberculosis patients. *Tuberculosis (Edinb)* 87: 295-302.



- 377 18. Shisana O, Rehle T, Simbayi L, Zuma K, Jooste S, et al. (2014) South African  
378 National HIV Prevalence, Incidence and Behaviour Survey, 2012. Cape Town:  
379 HSRC Press.
- 380 19. Ndjecka N (2014) Multi-drug resistant tuberculosis: strategic overview on MDR-TB  
381 care in South Africa. Pretoria: Department of Health, Republic of South Africa.
- 382 20. Brust JC, Lygizos M, Chaiyachati K, Scott M, van der Merwe TL, et al. (2011)  
383 Culture conversion among HIV co-infected multidrug-resistant tuberculosis  
384 patients in Tugela Ferry, South Africa. PLoS One 6: e15841.
- 385 21. Scientific ATF Axiom® Genome-Wide Population-Optimized Human Arrays  
386 Technical Documentation
- 387 22. International HapMap C, Frazer KA, Ballinger DG, Cox DR, Hinds DA, et al. (2007)  
388 A second generation human haplotype map of over 3.1 million SNPs. Nature  
389 449: 851-861.
- 390 23. Coussens AK, Wilkinson RJ, Hanifa Y, Nikolayevskyy V, Elkington PT, et al. (2012)  
391 Vitamin D accelerates resolution of inflammatory responses during tuberculosis  
392 treatment. Proc Natl Acad Sci U S A 109: 15449-15454.
- 393 24. Salahuddin N, Ali F, Hasan Z, Rao N, Aqeel M, et al. (2013) Vitamin D accelerates  
394 clinical recovery from tuberculosis: results of the SUCCINCT Study  
395 [Supplementary Cholecalciferol in recovery from tuberculosis]. A randomized,  
396 placebo-controlled, clinical trial of vitamin D supplementation in patients with  
397 pulmonary tuberculosis'. BMC Infect Dis 13: 22.
- 398 25. Sutaria N, Liu CT, Chen TC (2014) Vitamin D Status, Receptor Gene  
399 Polymorphisms, and Supplementation on Tuberculosis: A Systematic Review of  
400 Case-Control Studies and Randomized Controlled Trials. J Clin Transl  
401 Endocrinol 1: 151-160.

402

403 Table 1. Baseline participant characteristics and 2-month sputum culture status

| Characteristic                                        | Total<br>N=91<br>N (%) | Sputum culture<br>negative at 2-months<br>N=50 (55.0)<br>N (%) | Sputum culture<br>positive at 2-months<br>N=41 (45.1)<br>N (%) | <i>P</i><br>value <sup>A</sup> |
|-------------------------------------------------------|------------------------|----------------------------------------------------------------|----------------------------------------------------------------|--------------------------------|
| Male                                                  | 36 (39.6)              | 15 (30.0)                                                      | 21 (51.2)                                                      | 0.04                           |
| Median age, years (IQR)                               | 35 (29-42)             | 35 (27-41)                                                     | 38 (32-42)                                                     | 0.12                           |
| Current smoker <sup>B</sup>                           | 19 (20.9)              | 7 (14.0)                                                       | 12 (29.3)                                                      | 0.07                           |
| Alcohol <sup>B</sup>                                  | 28 (30.7)              | 14 (28.0)                                                      | 14 (34.2)                                                      | 0.53                           |
| Baseline AFB positive                                 | 39 (42.9)              | 18 (36.0)                                                      | 21 (51.2)                                                      | 0.14                           |
| Baseline cavity                                       | 50 (55.0)              | 26 (52.0)                                                      | 24 (58.5)                                                      | 0.53                           |
| Median baseline BMI<br>(IQR) N=82                     | 21.6 (18.5-24.6)       | 21.8 (19.4-24.4)                                               | 21.3 (16.8-24.9)                                               | 0.42                           |
| Previous TB treatment                                 | 74 (81.3)              | 40 (80.0)                                                      | 34 (82.9)                                                      | 0.72                           |
| HIV seropositive                                      | 73 (80.2)              | 40 (80.0)                                                      | 33 (80.5)                                                      | 0.95                           |
| Median baseline CD4<br>(IQR) N=46 <sup>C</sup>        | 199 (143-289)          | 185 (125-266)                                                  | 221 (143-309)                                                  | 0.61                           |
| On ARV at baseline <sup>C</sup> N=57                  | 44 (75.7)              | 24 (75.0)                                                      | 20 (76.9)                                                      | 0.66                           |
| Median baseline viral load<br>(IQR) N=42 <sup>C</sup> | 83 (39-13000)          | 65 (39-75278)                                                  | 100 (39-3200)                                                  | 0.94                           |
| Undetectable viral load<br>N=42 <sup>C</sup>          | 23 (54.8)              | 13 (56.5)                                                      | 10 (52.6)                                                      | 0.80                           |

404

405 Table 1 abbreviations: IQR-interquartile range; AFB-acid fast bacilli; ARV-antiretroviral

406 A. 2-side chi-square p-value, except for age (2-sided Wilcoxon rank sum)

407 B. Self-reported

408 C. Among HIV positive only

409

410

411 Table 2. Hazard of sputum culture conversion by vitamin D receptor gene single nucleotide polymorphism

| SNP        | Model N | Days <sup>A</sup> (IQR) | HR   | 95% CI    | <i>P</i> value <sup>B</sup> | Adjusted N | aHR <sup>C</sup> | 95% CI    | <i>P</i> value <sup>B</sup> |
|------------|---------|-------------------------|------|-----------|-----------------------------|------------|------------------|-----------|-----------------------------|
| rs74085240 | 88      | 57 (17-113)             | 0.54 | 0.28-1.07 | 0.077                       | 88         | 0.30             | 0.14-0.67 | 0.003                       |
| rs1015390  | 88      | 55 (19-90)              | 0.67 | 0.46-0.99 | 0.045                       | 88         | 0.54             | 0.35-0.82 | 0.004                       |
| rs4073729  | 91      | 56 (27-114)             | 0.72 | 0.50-1.05 | 0.085                       | 91         | 0.56             | 0.37-0.85 | 0.006                       |
| rs11168268 | 91      | 55 (1-111)              | 0.63 | 0.42-0.94 | 0.024                       | 91         | 0.55             | 0.36-0.85 | 0.008                       |
| rs2525044  | 91      | 55 (1-111)              | 0.57 | 0.33-0.97 | 0.038                       | 91         | 0.46             | 0.24-0.86 | 0.015                       |
| rs11168287 | 91      | 57 (19-122)             | 0.76 | 0.52-1.09 | 0.139                       | 91         | 0.64             | 0.42-0.98 | 0.040                       |
| rs2238139  | 91      | 55 (1-108)              | 0.66 | 0.43-1.01 | 0.054                       | 91         | 0.60             | 0.37-0.98 | 0.042                       |
| rs11574138 | 91      | 57 (1-113)              | 0.78 | 0.39-1.57 | 0.486                       | 91         | 0.43             | 0.19-1    | 0.049                       |
| rs11168327 | 91      | 84 (41-131)             | 1.30 | 0.90-1.88 | 0.155                       | 91         | 1.81             | 1.16-2.84 | 0.009                       |
| rs11574143 | 91      | 72 (26-156)             | 1.73 | 1.02-2.93 | 0.041                       | 91         | 2.05             | 1.16-3.63 | 0.014                       |

412

413 Table 2A abbreviations: IQR-interquartile range; SNP-single nucleotide polymorphism; CI-confidence interval; rs-reference SNP

- 414 A. Median days to sputum culture conversion among SNPs carrying 0 effect alleles  
415 B. Wald test p-value, SNPs are listed in ascending order based on p-value  
416 C. Hazard ratios estimated from Cox Proportional regression models adjusted for age, sex, smoking status, alcohol, AFB smear status, HIV  
417 status, and cavitory disease; SNPs modelled additively, hazard ratio indicates per additional risk allele on each SNP.  
418

419

420

421 **Table 3.** Poor tuberculosis treatment outcome by vitamin D receptor gene single  
 422 nucleotide polymorphism, N=88

| SNP         | Total<br>N=88 | Poor Outcome <sup>A</sup><br>N=17 (19.3)<br>N (%) | Cured/Completed<br>N=71 (80.7)<br>N (%) | Odds ratio<br>(95% CI) |
|-------------|---------------|---------------------------------------------------|-----------------------------------------|------------------------|
| rs74085240* |               |                                                   |                                         |                        |
| CC          | 2             | 1 (50.0)                                          | 1 (50.0)                                | 7.50 (0.24-68.83)      |
| CA          | 8             | 1 (12.5)                                          | 7 (87.5)                                | 0.58 (0.07-50.09)      |
| AA          | 76            | 15 (19.7)                                         | 61 (80.3)                               | 1.00                   |
| NA          | 2             | 0                                                 | 2 (100)                                 |                        |
| rs11574138* |               |                                                   |                                         |                        |
| CC          | 1             | 0                                                 | 1 (100)                                 | NA                     |
| CT          | 8             | 3 (37.5)                                          | 5 (62.5)                                | 2.79 (0.60-13.04)      |
| TT          | 79            | 14 (17.7)                                         | 65 (82.3)                               | 1.00                   |
| rs11168268* |               |                                                   |                                         |                        |
| GG          | 9             | 3 (33.3)                                          | 6 (66.7)                                | 2.50 (0.50-12.46)      |
| GA          | 37            | 7 (18.9)                                          | 30 (81.2)                               | 1.17 (0.37-3.71)       |
| AA          | 42            | 7 (16.7)                                          | 35 (83.3)                               | 1.00                   |
| rs2525044*  |               |                                                   |                                         |                        |
| AA          | 2             | 1 (50.0)                                          | 1 (50.0)                                | 5.09 (0.30-87.68)      |
| AG          | 19            | 5 (26.3)                                          | 14 (73.7)                               | 1.82 (0.54-6.09)       |
| GG          | 67            | 11 (16.4)                                         | 56 (83.6)                               | 1.00                   |
| rs1015390*  |               |                                                   |                                         |                        |
| TT          | 9             | 2 (22.2)                                          | 7 (77.8)                                | 0.86 (0.15-1.53)       |
| TC          | 44            | 6 (13.6)                                          | 38 (86.4)                               | 0.47 (0.15-5.00)       |
| CC          | 32            | 8 (25.0)                                          | 24 (75.0)                               | 1.00                   |
| NA          | 3             | 1 (33.3)                                          | 2 (66.7)                                |                        |
| rs2238139   |               |                                                   |                                         |                        |
| GG          | 5             | 2 (40.0)                                          | 3 (60.0)                                | 3.33 (0.49-22.60)      |
| GA          | 23            | 5 (21.7)                                          | 18 (78.3)                               | 1.39 (0.42-4.62)       |
| AA          | 60            | 10 (16.7)                                         | 50 (83.3)                               | 1.00                   |

423

424 Table 3 abbreviations: SNP-single nucleotide polymorphism; rs-reference SNP; CI-confidence interval;  
 425 NA-snp information not available

426 **A.** Poor outcome defined as death or failure.

427 **Figure 1.** Principal component analysis of study participants compared to HapMap  
428 ethnic groups

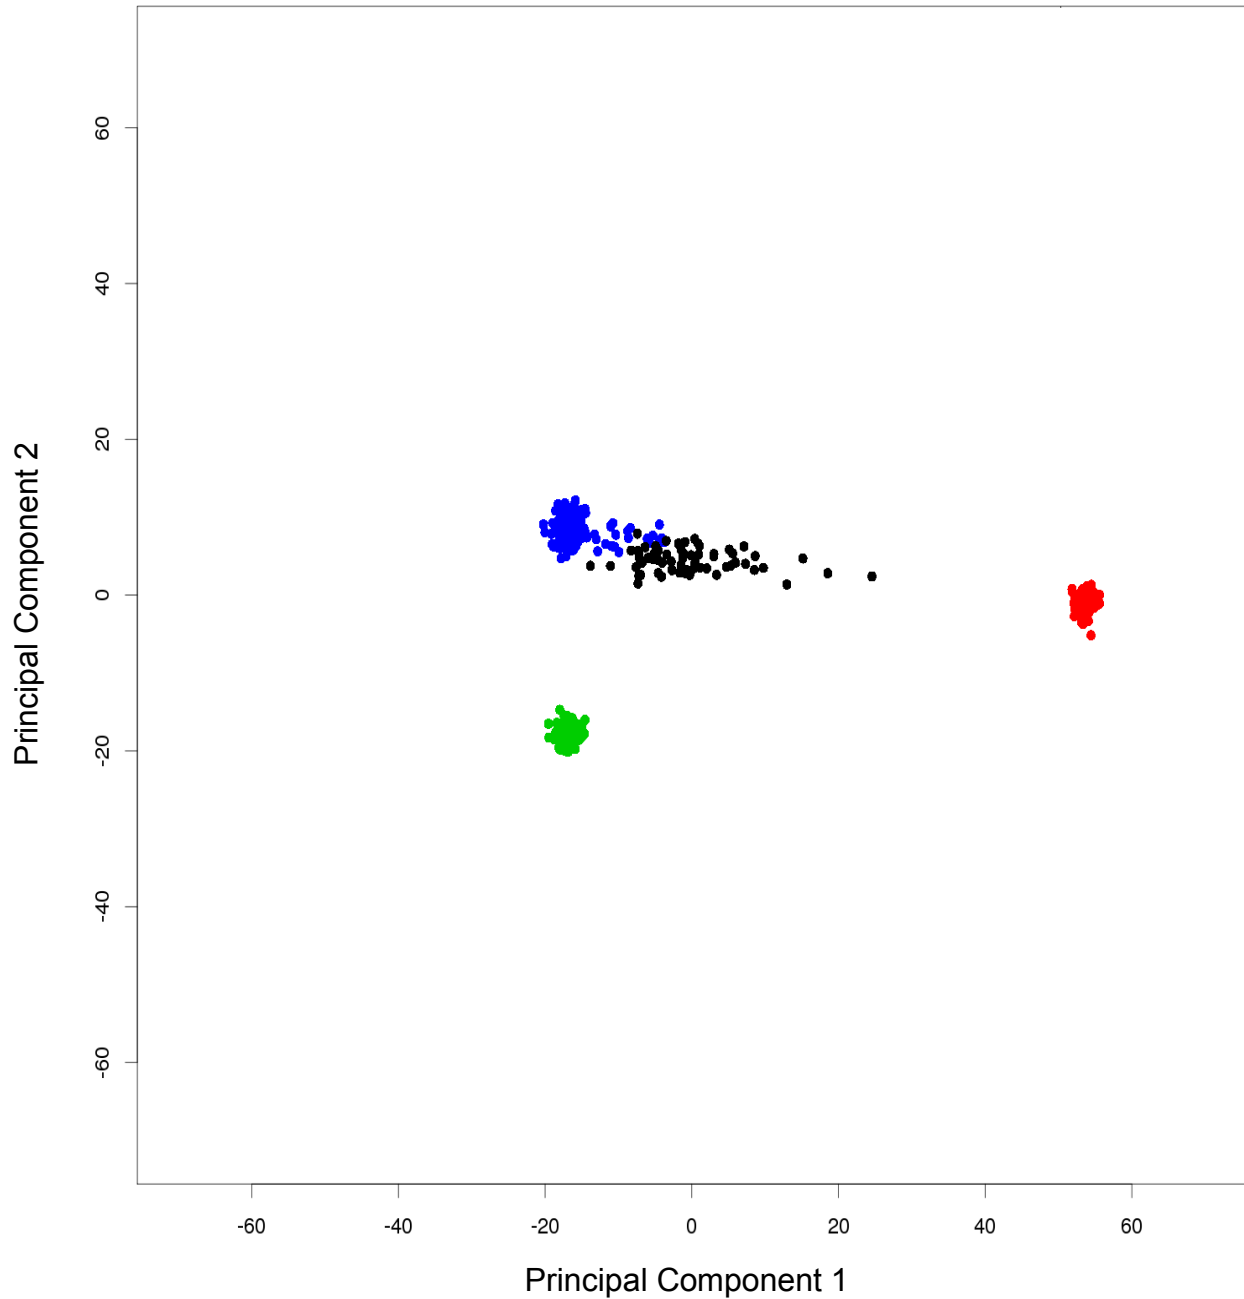

429 ■ Participants with MDR TB, KwaZulu-Natal, South Africa

430  
431 HapMap Ethnicity Groups:

432 ■ Yoruba, Nigeria

433 ■ African ancestry in Southwest, USA

434 ■ European ancestry, Utah, USA

435  
436

437 **Supplemental Table 1.** Vitamin D receptor gene single nucleotide polymorphisms not  
 438 significantly associated with initial time to sputum culture conversion

| SNP        | P-value <sup>A</sup> | SNP        | P-value <sup>A</sup> | SNP        | P-value <sup>A</sup> |
|------------|----------------------|------------|----------------------|------------|----------------------|
| rs10875705 | 0.052                | rs7963776  | 0.337                | rs2525049  | 0.634                |
| rs987849   | 0.062                | rs11568820 | 0.341                | rs11574110 | 0.668                |
| rs2239185  | 0.063                | rs2239179  | 0.354                | rs7302235  | 0.671                |
| rs35609792 | 0.070                | rs11168309 | 0.359                | rs60556433 | 0.676                |
| rs10875700 | 0.079                | rs11168328 | 0.366                | rs58187695 | 0.683                |
| rs74088704 | 0.087                | rs11574070 | 0.387                | rs58426141 | 0.718                |
| rs7309452  | 0.092                | rs61919101 | 0.399                | rs4237855  | 0.725                |
| rs11168319 | 0.101                | rs6580642  | 0.401                | rs10467099 | 0.732                |
| rs74086592 | 0.104                | rs7976091  | 0.416                | rs58436504 | 0.735                |
| rs7974905  | 0.110                | rs739837   | 0.419                | rs3819545  | 0.737                |
| rs2246001  | 0.118                | rs12313208 | 0.421                | rs12308082 | 0.740                |
| rs1544410  | 0.120                | rs12717991 | 0.425                | rs10747526 | 0.772                |
| rs4334089  | 0.143                | rs12721416 | 0.428                | rs11168307 | 0.773                |
| rs58379944 | 0.144                | rs2228572  | 0.431                | rs2107301  | 0.778                |
| rs7965281  | 0.158                | rs58789572 | 0.438                | rs11168263 | 0.780                |
| rs11168280 | 0.177                | rs7965943  | 0.444                | rs11574100 | 0.787                |
| rs4442605  | 0.180                | rs11168306 | 0.449                | rs7974708  | 0.796                |
| rs2525043  | 0.183                | rs11574050 | 0.455                | rs10747524 | 0.798                |
| rs757555   | 0.183                | rs7305032  | 0.465                | rs7311030  | 0.799                |
| rs1859281  | 0.186                | rs12314197 | 0.471                | rs2544037  | 0.802                |
| rs4237856  | 0.216                | rs7965274  | 0.475                | rs2239182  | 0.819                |
| rs4393380  | 0.221                | rs11574053 | 0.483                | rs2544039  | 0.834                |
| rs11574044 | 0.222                | rs73109883 | 0.506                | rs10783221 | 0.839                |
| rs2525045  | 0.225                | rs10459227 | 0.515                | rs12721397 | 0.847                |
| rs886441   | 0.241                | rs7970376  | 0.517                | rs12303561 | 0.848                |
| rs2238136  | 0.243                | rs11168325 | 0.538                | rs10459217 | 0.850                |
| rs4254129  | 0.246                | rs7967673  | 0.542                | rs4760648  | 0.856                |
| rs11574041 | 0.252                | rs11574081 | 0.548                | rs12299534 | 0.863                |
| rs7975128  | 0.255                | rs731236   | 0.549                | rs11168261 | 0.877                |
| rs12721370 | 0.270                | rs61553170 | 0.555                | rs61558228 | 0.882                |
| rs11574005 | 0.273                | rs12321826 | 0.558                | rs74085273 | 0.898                |
| rs2238140  | 0.278                | rs11168314 | 0.563                | rs11168264 | 0.910                |
| rs2853560  | 0.291                | rs4341603  | 0.565                | rs2239186  | 0.925                |
| rs4307774  | 0.292                | rs2238138  | 0.577                | rs2189480  | 0.934                |
| rs11168311 | 0.308                | rs2408876  | 0.580                | rs11168277 | 0.953                |
| rs4760674  | 0.331                | rs2544038  | 0.580                | rs3890734  | 0.954                |
| rs4328263  | 0.334                | rs2853561  | 0.619                | rs4760658  | 0.954                |

439  
 440 A. Wald test p-value from Cox Proportional regression models adjusted for age, sex, smoking  
 441 status, alcohol, AFB smear status, HIV status, and cavitory disease; SNPs modelled additively.  
 442

443

444
